# Supplementary material
Source: Elsevier journal article supplement (https://www.sciencedirect.com/science/article/pii/S0210480619302165)
Supplement: mmc1 [file S0210480619302165:mmc1.pdf]

| Author            | Study Design       | Summary of findings                                                                           |
|-------------------|--------------------|-----------------------------------------------------------------------------------------------|
| Schegel and Walsh |                    | First description of combined surgery                                                         |
| Celik et al.      | Case-control study | 20 patients vs 40 controls.<br>No significant differences in operative time and complications |
| Gozen et al.      | Case-control study | mean VAS score 5.65 versus 4.98, patients vs controls ( $p = 0.06$ )                          |
| Do et al.         | Case study         | 93 patients: combined surgery feasible, no increase in the complications rate                 |

**Supplementary Table 1:** available studies on the convenience and safety of combined prostatectomy and hernioplasty;

| Author             | Study Design                   | Summary of findings                                                                                                                                                                                                                                                                                                                                                                                                         |
|--------------------|--------------------------------|-----------------------------------------------------------------------------------------------------------------------------------------------------------------------------------------------------------------------------------------------------------------------------------------------------------------------------------------------------------------------------------------------------------------------------|
| Borchers et al.    |                                | Description and recommendation of perineal approach for prostatectomy                                                                                                                                                                                                                                                                                                                                                       |
| Katz et al.        |                                | two “aborted” retropubic prostatectomies in patients with mesh                                                                                                                                                                                                                                                                                                                                                              |
| Brown and Dahl     |                                | first 2 cases in which radical prostatectomy was completed in patients who previously underwent laparoscopic hernioplasty                                                                                                                                                                                                                                                                                                   |
| Stolzenburg et al. | comparative study              | longer operative time, lymph-nodes dissection not performed in patients with previous hernioplasty                                                                                                                                                                                                                                                                                                                          |
| Erdogru et al.     | comparative study (match-pair) | More consistent use of analgesics if previous hernioplasty. Mean amount of narcotic analgesic was significantly higher in the group of patients who underwent transperitoneal laparoscopic radical prostatectomy and had a history of transperitoneal laparoscopic inguinal herniorrhaphy compared with open and no-surgery groups ( $32.1 \pm 11.9$ , $21.8 \pm 11.9$ and $19.5 \pm 10.1$ mg, respectively, $p = 0.002$ ). |

**Supplementary Table 2:** available studies on the feasibility of prostatectomy in patients who previously underwent laparoscopic hernioplasty.
